# Supplementary material for: Detection and Removal of Biases in the Analysis of Next-Generation Sequencing Reads
Source: PubMed Central journal article supplement (PMC3031631; doi:10.1371/journal.pone.0016685), 2011-01-31
Supplement: pone.0016685.s001.pdf [file pone.0016685.s001.pdf]

**Supplementary Materials:**  
**Detection and removal of biases in the  
analysis of next-generation sequencing reads**

**Schraga Schwartz<sup>1,2</sup>, Ram Oren<sup>1,2</sup>, and Gil Ast<sup>1</sup>**

<sup>1</sup>Department of Human Molecular Genetics and Biochemistry, Sackler Faculty of Medicine, Tel-Aviv University, Ramat Aviv 69978, Israel

<sup>2</sup>These authors contributed equally.

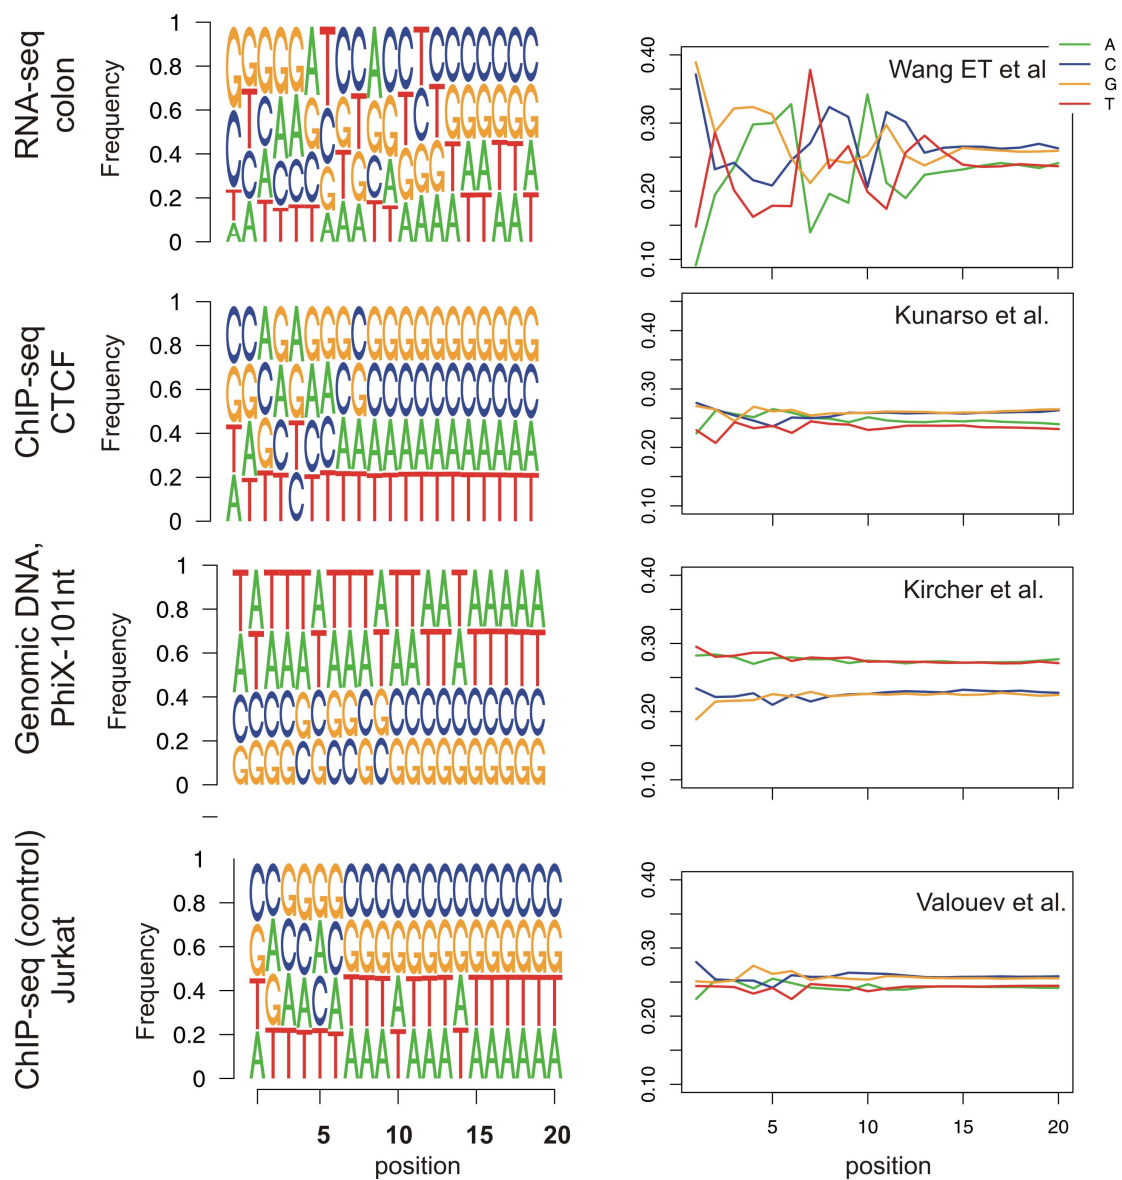

**Supplementary Figure 1:** Sequence logos and positional nucleotide plots for several additional examined datasets, as in Figure 1.

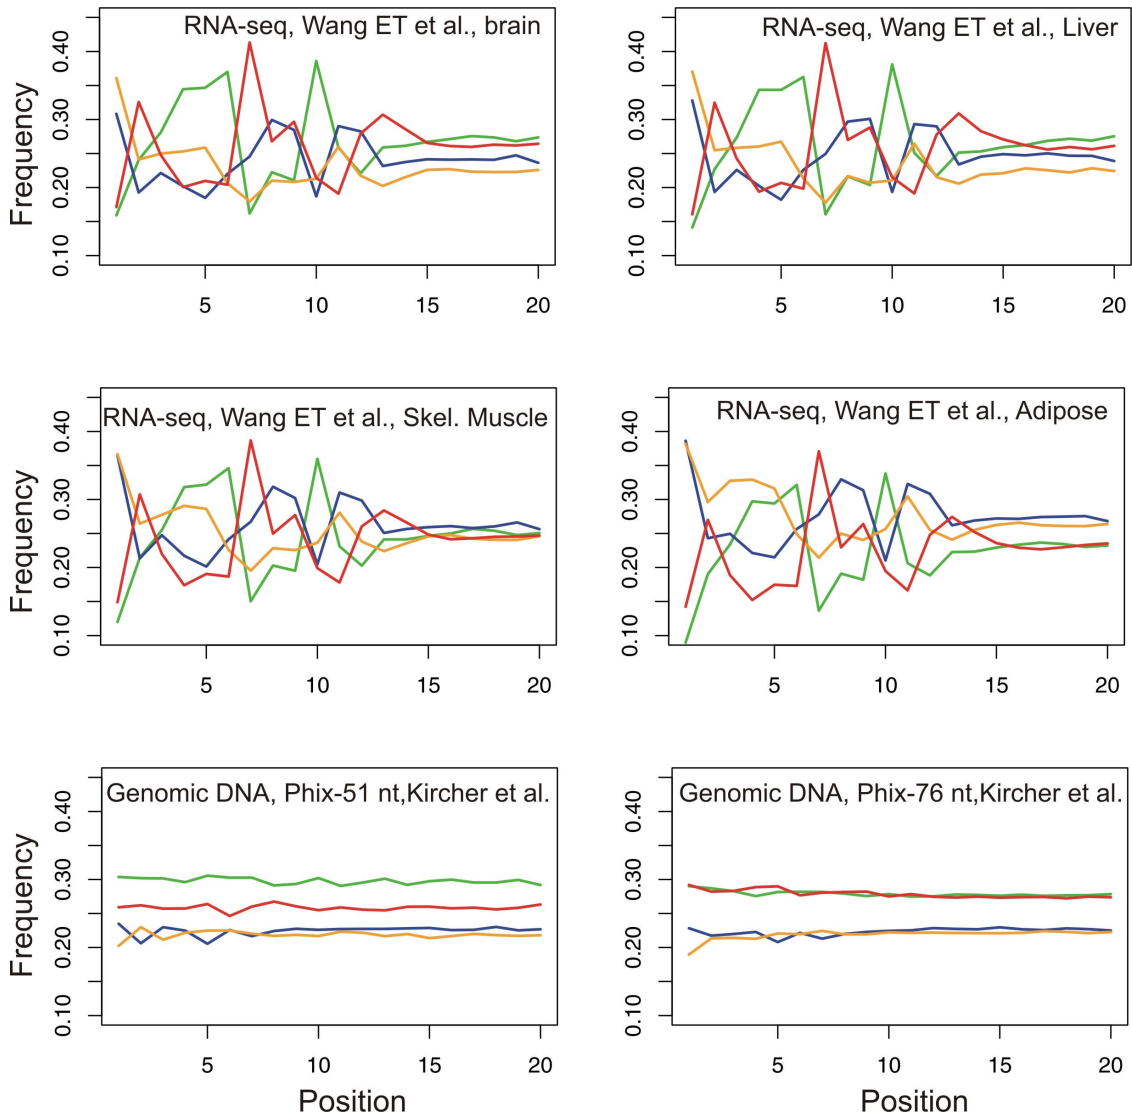

**Supplementary Figure 2:** Positional nucleotide plots for several additional examined datasets, as in Figure 1 and in Supplementary Figure 1.

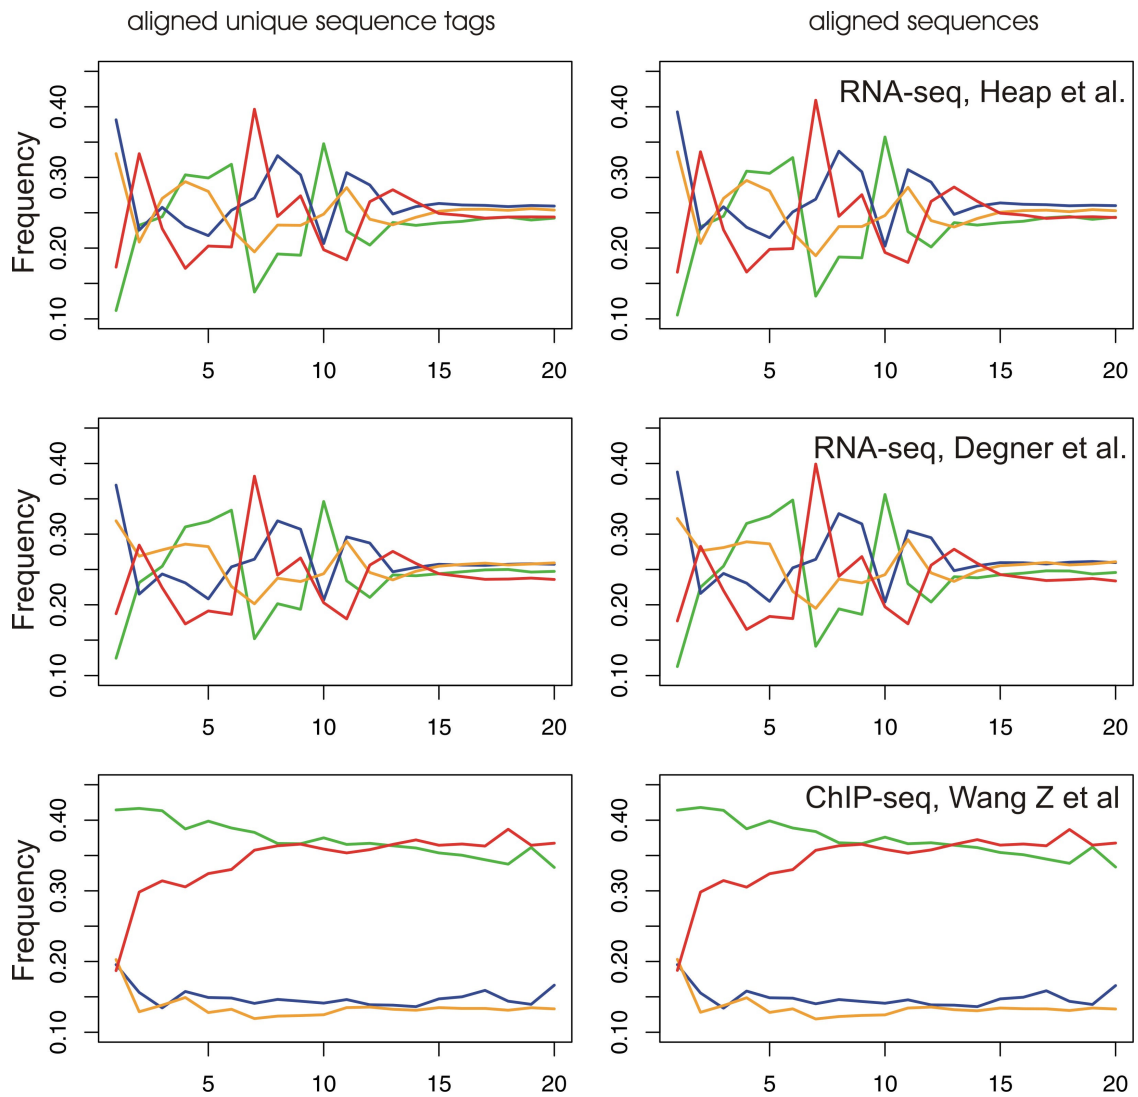

**Supplementary Figure 3:** Comparison of nucleotide composition when examining only unique sequence tags (left column), as opposed to all sequences (as shown in Figure 1 in the manuscript). This analysis demonstrates that the bias in nucleotide composition is not likely to have occurred as a result of biased PCR amplification of few specific amplicons.

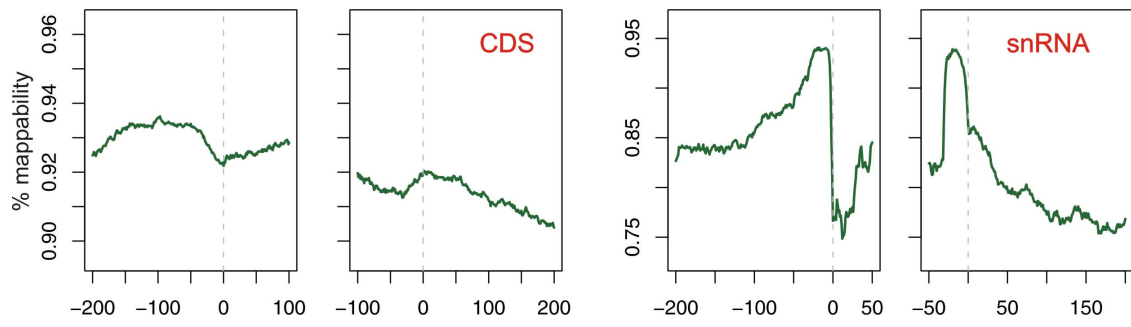

**Supplementary Figure 4:** Mappability density values within the regions surrounding the coding sequence start and end sites, and snRNAs.

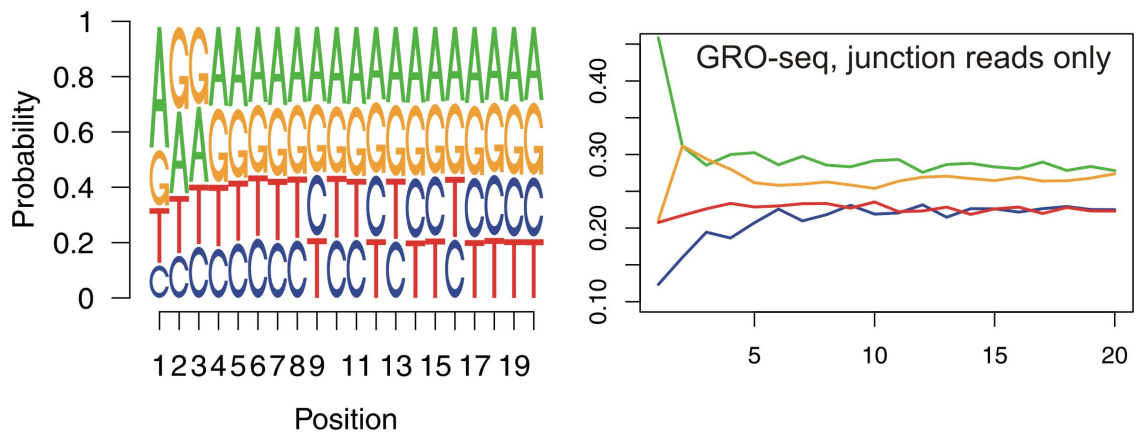

**Supplementary Figure 5:** Sequence logos and positional nucleotide plots for junction reads in GRO-seq data. The similarity of these plots to the ones in Figure 4C-D demonstrates that the bias is presumably not due to biased hydrolysis of BrU containing residues, as it is present also in reads originating from contaminating mRNA.
